# Supplementary material
Source: PubMed Central journal article supplement (PMC4157123)
Supplement: NIHMS615544-supplement-1.pdf [file NIHMS615544-supplement-1.pdf]

# Supplementary Figure 1

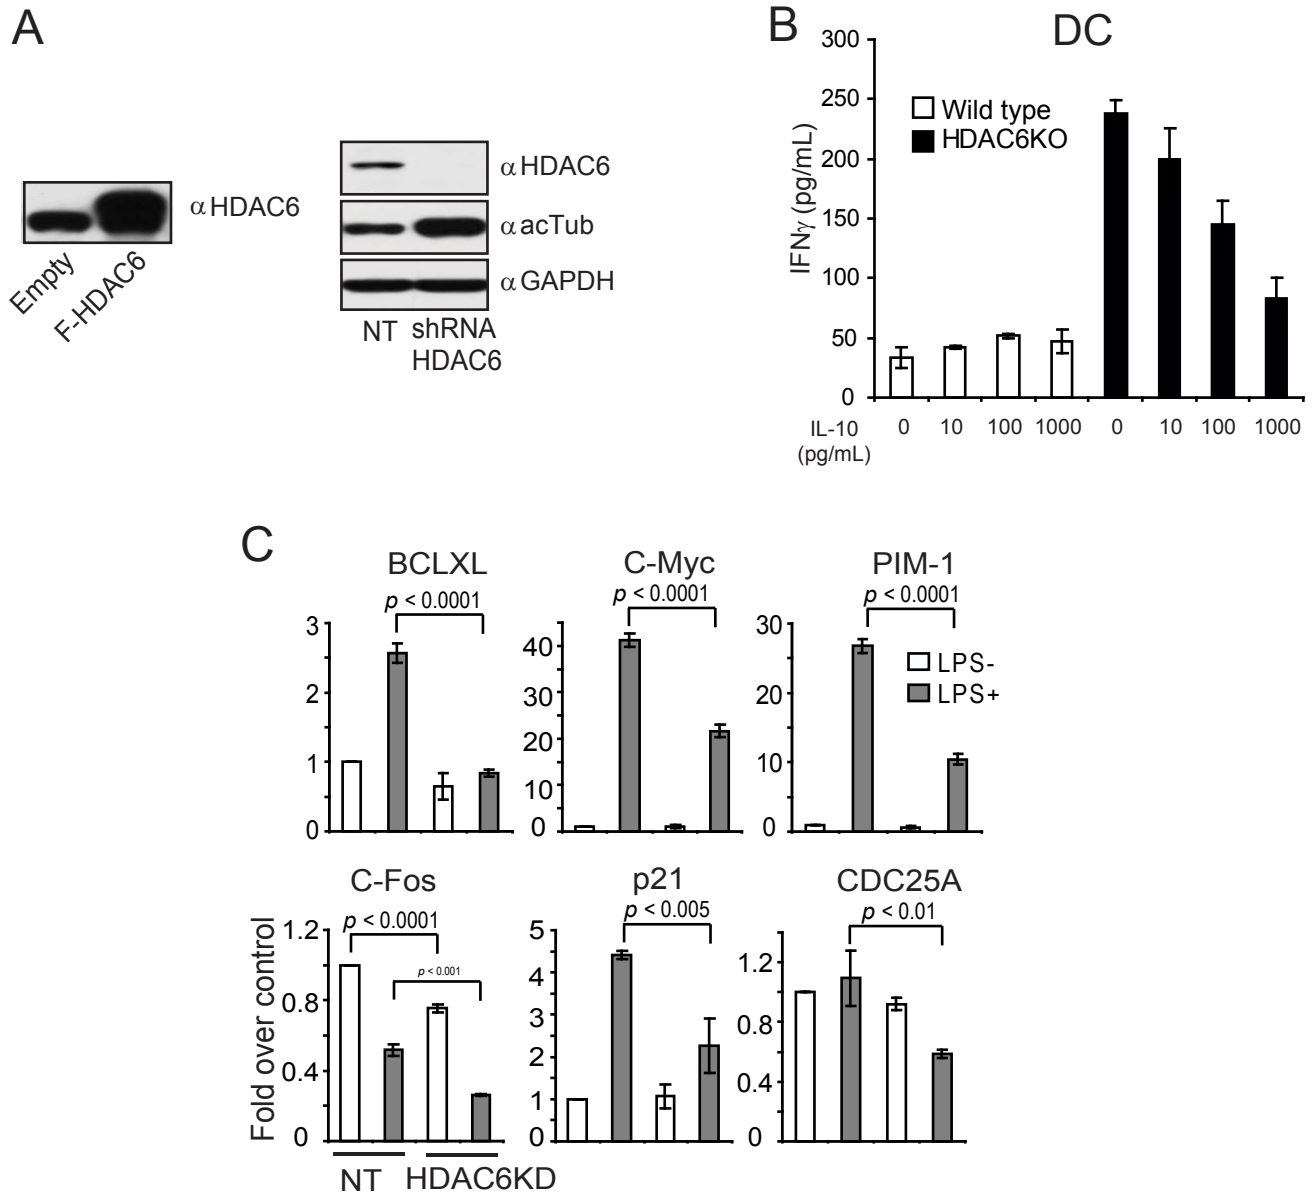

**Supplemental Figure 1. (A)** RAW26.7 cells in which HDAC6 was over-expressed (left) or knocked down (right) were assayed by immunoblot using specific antibodies for HDAC6, acetylated tubulin (ac-Tub) or GAPDH. **(B)** DCs isolated from WT or HDAC6KO mice were treated with increasing concentrations of IL-10 (pg/ml). Then, their antigen-presenting function was evaluated as described in Methods and IFN- $\gamma$  production by antigen-specific CD4<sup>+</sup> T-cells was determined by ELISA. Three experiments were performed with similar results. Error bars represent standard deviation from triplicates. **(C)** Non-target (NT) or HDAC6KD RAW26.7 cells were stimulated with LPS (1.0  $\mu$ g/ml) for 2 h. Then, total RNA was isolated and analyzed by qRT-PCR for expression of *Bcl-xL*, *c-Myc*, *Pim-1*, *c-Fos*, *p21* and *CDC25a*. *GAPDH* expression was used as the control. The results are expressed as a fold over untreated cells and calculated by the Pfaffl equation. Three experiments were performed with similar results. Error bars represent standard deviation from triplicates.

## Supplementary Figure 2

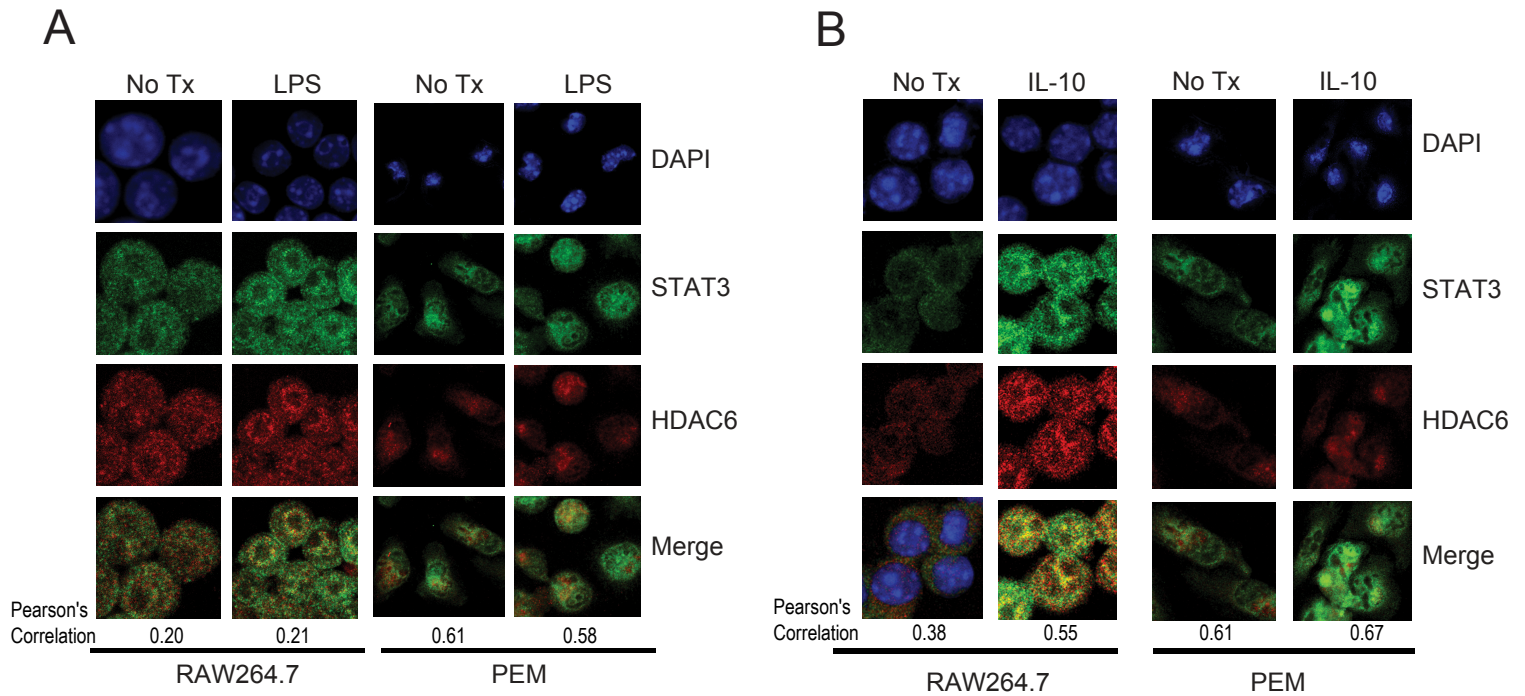

### C Tyr Phosphatase Activity

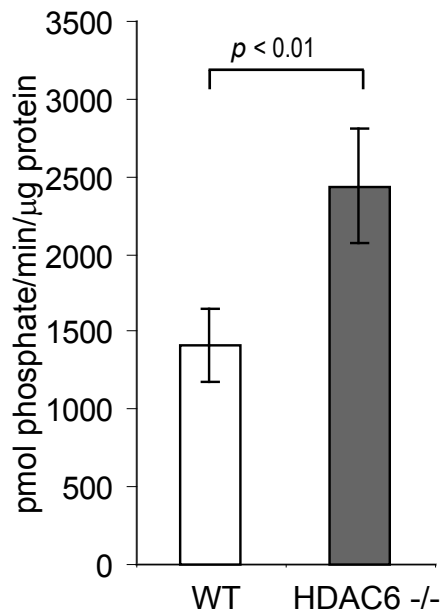

**Supplemental Figure 2.** RAW264.7 cells and PEM were stimulated with LPS (1.0  $\mu\text{g}/\text{mL}$ ) (**A**) or IL-10 (10ng/mL) (**B**) and then analyzed by confocal microscopy with an  $\alpha$ -HDAC6 antibody (red) and  $\alpha$ -STAT3 antibody (green). Shown is a representative set of pictures of four experiments with similar results. (**B**) PEM were isolated from WT or HDAC6KO mice and tyrosine phosphatase activity was detected using a tyrosine phosphatase assay system (Promega, WI) following manufacture's protocol.
